# Supplementary material
Source: PubMed Central journal article supplement (PMC8941051)
Supplement: 13244_2022_1184_MOESM1_ESM.pdf [file 13244_2022_1184_MOESM1_ESM.pdf]

# Always consider the needs of your *patients*



## **Purpose**

- Do you inform your patients of the reason for the need for an imaging examination?

## **Advance**

- Do you provide your patients with information about examinations in advance?

## **Transparency**

- Do you inform your patients of the benefits of imaging & any potential harms and limitations?

## **Information**

- Do you give clear and understandable patient information about examinations? Do you obtain patient consent?

## **Equality**

- Do you provide fair and equal care?

## **Needs**

- Do you think all the patients' needs are met?

## **Trust**

- Do you think your patients have trust in your staff and imaging equipment?

## **Shared**

- Do you involve your patients in their medical decisions?

## **Decision-making**

## **Comfort**

- Do you offer comfortable conditions and surroundings during the patients' visits?

## **Attentiveness**

- Are your staff available to listen to all patients' concerns?

## **Reassurance**

- Do your staff try to calm patients' fears and put them at ease?

## **Explanations**

- Do your staff provide explanations during the imaging examination?

## **Results**

- Do you give information about how and when patients can expect results?

## **Safety**

- Do you think your patients feel safe?

## **AIMS**

- Do you provide a patient questionnaire?

## **Ascertain If**

- Do you act upon responses received, in an effort to improve the services you provide?

## **Medical imaging was**

## **Satisfactory**
